# Supplementary material for: “Feed-and-wrap” technique versus deep sedation for neonatal magnetic resonance imaging: a retrospective comparative study
Source: Springer Nature journal article supplement (doi:10.1007/s00330-024-10777-6), 2024-05-07
Supplement: MOESM1 [file 27064844]

**“Feed-and-wrap” technique versus deep sedation for neonatal magnetic resonance imaging: a retrospective comparative study**

**ELECTRONIC SUPPLEMENTARY MATERIAL**

**Supplementary Table 1** – Differences in total examination length, analysis of different subgroups based on the use of contrast agent and body region.

| <b>Length of the examination (min)</b> | <b>Sedation</b>      | <b>„Feed-and-Wrap“</b> | <b>Total</b>         | <b>p- value</b>   |
|----------------------------------------|----------------------|------------------------|----------------------|-------------------|
| All patients                           | 39 ± 14<br>(n = 243) | 32 ± 12<br>(n = 189)   | 36 ± 14<br>(n = 432) | <b>&lt; 0.001</b> |
| Without contrast agent                 | 36 ± 13<br>(n = 169) | 31 ± 11<br>(n = 177)   | 34 ± 13<br>(n = 346) | <b>&lt; 0.001</b> |
| With contrast agent                    | 44 ± 15<br>(n = 74)  | 42 ± 17<br>(n = 12)    | 44 ± 15<br>(n = 86)  | 0.995             |
| Head                                   | 38 ± 10<br>(n = 138) | 32 ± 9<br>(n = 122)    | 35 ± 10<br>(n = 260) | <b>&lt; 0.001</b> |
| Neck/Thorax                            | 37 ± 7<br>(n = 5)    | 33 ± 21<br>(n = 6)     | 34 ± 15<br>(n = 11)  | 0.429             |
| Abdomen                                | 31 ± 12<br>(n = 30)  | 22 ± 9<br>(n = 28)     | 26 ± 11<br>(n = 58)  | <b>0.001</b>      |
| Musculoskeletal                        | 28 ± 12<br>(n = 19)  | 30 ± 16<br>(n = 8)     | 28 ± 13<br>(n = 27)  | 0.897             |
| Whole-body/multiple regions            | 50 ± 19<br>(n = 51)  | 40 ± 15<br>(n = 25)    | 47 ± 18<br>(n = 76)  | <b>0.043</b>      |

All values are presented as mean ± standard deviation, and total numbers of patients in the respective subgroup (in brackets). Significant differences are marked in bold.

**Supplementary Table 2** – Estimated incidence rate ratios derived from negative binomial model, subgroup analysis based on corrected age.

| <b>Predictor</b>                                                                                                                               | <b>Incidence rate ratio (95%-confidence interval)</b>                                | <b>p- value</b>                                     |
|------------------------------------------------------------------------------------------------------------------------------------------------|--------------------------------------------------------------------------------------|-----------------------------------------------------|
| <b>Technique</b><br>FWT versus sedation                                                                                                        | 3.39 (1.47 – 7.83)                                                                   | <b>&lt; 0.001</b>                                   |
| <b>Corrected age [days]</b>                                                                                                                    | 1.014 (1.005 – 1.024)                                                                | <b>0.004</b>                                        |
| <b>Gender</b><br>male versus female                                                                                                            | 0.96 (0.72 – 1.3)                                                                    | 0.964                                               |
| <b>Body weight [kg]</b>                                                                                                                        | 0.7 (0.54 – 0.9)                                                                     | <b>0.006</b>                                        |
| <b>Body region</b><br>neck/thorax versus head<br>abdomen versus head<br>musculoskeletal versus head<br>whole-body/multiple regions versus head | 0.52 (0.22 – 1.25)<br>0.56 (0.35 – 0.89)<br>0.86 (0.43 – 1.74)<br>0.44 (0.29 – 0.69) | 0.521<br><b>0.015</b><br>0.682<br><b>&lt; 0.001</b> |
| <b>Field strength</b><br>3T versus 1.5T                                                                                                        | 1.12 (0.83 – 1.51)                                                                   | 0.442                                               |

a) Results of subgroup 1 (corrected age of 50 days or lower, n = 292)

| <b>Predictor</b>                                                                                                                               | <b>Incidence rate ratio (95%-confidence interval)</b>                                      | <b>p- value</b>                        |
|------------------------------------------------------------------------------------------------------------------------------------------------|--------------------------------------------------------------------------------------------|----------------------------------------|
| <b>Technique</b><br>FWT versus sedation                                                                                                        | 162 (63 – 420)                                                                             | <b>&lt; 0.001</b>                      |
| <b>Corrected age [days]</b>                                                                                                                    | 1.072 (1.042 – 1.1)                                                                        | <b>&lt; 0.001</b>                      |
| <b>Gender</b><br>male versus female                                                                                                            | 1.57 (0.58 – 4.22)                                                                         | 0.342                                  |
| <b>Body weight [kg]</b>                                                                                                                        | 0.57 (0.36 – 0.9)                                                                          | <b>0.016</b>                           |
| <b>Body region</b><br>neck/thorax versus head<br>abdomen versus head<br>musculoskeletal versus head<br>whole-body/multiple regions versus head | n/a (low sample size)<br>0.04 (0.01 – 0.19)<br>n/a (low sample size)<br>0.04 (0.01 – 0.15) | <b>&lt; 0.001</b><br><b>&lt; 0.001</b> |
| <b>Field strength</b><br>3T versus 1.5T                                                                                                        | 0.27 (0.11 – 0.68)                                                                         | <b>0.005</b>                           |

b) Results of subgroup 2 (corrected age > 50 days, n = 126, 14 cases – neck/thorax and musculoskeletal – excluded due to low sample size for body region)
